# Supplementary material for: A lifecourse mendelian randomization study highlights the long-term influence of childhood body size on later life heart structure
Source: PLoS Biol. 2022 Jun 9;20(6):e3001656. doi: 10.1371/journal.pbio.3001656 (PMC9182693; doi:10.1371/journal.pbio.3001656)
Supplement: S2 Table — (XLSX) [file pbio.3001656.s005.xlsx]

## Sheet: Sheet1
S2 Table - Characteristics for the exposures and outcomes analysed in this study
Proportion of childhood & adult body size categories amongst participants in the UK Biobank
Category	Numbers of participants
Thinner	135819
About average	207277
Plumper	64645
Adulthood measured BMI cutoffs
Thinner to above average cutoff	About average to plumper cutoff
25 kg/m2	31.7 kg/m2
Magnetic Resonance Imaging (MRI) datasets
Trait	All	Women	Men	Source
Age at MRI	64 (7.5)	63 (7.4)	65 (7.7)	Pirruccello et al (https://www.nature.com/articles/s41467-020-15823-7)
Left ventricular end diastolic blood pressure	140 (29)	120 (20)	150 (28)	Pirruccello et al (https://www.nature.com/articles/s41467-020-15823-7)
Left ventricular end systolic blood pressure	49 (16)	41 (11)	58 (17)	Pirruccello et al (https://www.nature.com/articles/s41467-020-15823-7)
Left ventricular ejection fraction	0.65 (0.058)	0.67 (0.051)	0.63 (0.058)	Pirruccello et al (https://www.nature.com/articles/s41467-020-15823-7)
Stroke volume	88 (16)	81 (12)	95 (17)	Pirruccello et al (https://www.nature.com/articles/s41467-020-15823-7)
Visceral adipose tissue (Volume (L))	3.92 (2.3)	2.78 (1.6)	5.14 (2.3)	Liu et al (https://elifesciences.org/articles/65554)
Abdominal subcutaneous adipose tissue (Volume (L))	8.16 (4.1)	9.57 (4.3)	6.64 (3.2)	Liu et al (https://elifesciences.org/articles/65554)
Lungs (Volume (L))	2.67 (0.73)	2.32 (0.53)	3.03 (0.75)	Liu et al (https://elifesciences.org/articles/65554)
Spleen (Volume (L))	0.17 (0.072)	0.14 (0.054)	0.2 (0.078)	Liu et al (https://elifesciences.org/articles/65554)
Kidney (Volume (L))	0.14 (0.03)	0.12 (0.023)	0.16 (0.028)	Liu et al (https://elifesciences.org/articles/65554)
Pancreas (Volume (L))	0.06 (0.018)	0.06 (0.016)	0.06 (0.019)	Liu et al (https://elifesciences.org/articles/65554)
Liver (Volume (L))	1.38 (0.3)	1.28 (0.25)	1.49 (0.3)	Liu et al (https://elifesciences.org/articles/65554)
Pancreas (Fat (%))	10.41 (7.9)	8.34 (6.7)	12.6 (8.5)	Liu et al (https://elifesciences.org/articles/65554)
Liver (Fat (%))	5.06 (5)	4.43 (4.7)	5.73 (5.2)	Liu et al (https://elifesciences.org/articles/65554)
Pancreas (Iron (mg/g))	0.77 (0.097)	0.8 (0.1)	0.75 (0.084)	Liu et al (https://elifesciences.org/articles/65554)
Liver (Iron (mg/g))	1.22 (0.26)	1.2 (0.24)	1.24 (0.28)	Liu et al (https://elifesciences.org/articles/65554)
